# Supplementary material for: Physicochemical, microbial, and aroma characteristics of Chinese pickled red peppers (Capsicum annuum) with and without biofilm
Source: Royal Society of Chemistry journal article supplement (doi:10.1039/d0ra00490a), 2020-01-01
Supplement: d0ra00490a1.pdf [file d0ra00490a1.pdf]

**1 Supplementary Table Volatile compounds identified in NPRP and FPRP**

| Retention time/ min | Compounds                                        | RI <sup>1</sup><br>SH-Rxi-<br>5Sil MS | Concentration ( $\mu\text{g}/\text{kg}$ )<br>(n=6) <sup>2</sup> |              | Methods of identification <sup>3</sup> |
|---------------------|--------------------------------------------------|---------------------------------------|-----------------------------------------------------------------|--------------|----------------------------------------|
|                     |                                                  |                                       | NPRP                                                            | FPRP         |                                        |
| <i>Alcohols</i>     |                                                  |                                       |                                                                 |              |                                        |
| 1                   | Ethanol                                          | <700                                  | 48.0±11.3                                                       | 68.5±30.4    | AB                                     |
| 2                   | 3-Methyl-1-butanol                               | 721                                   | 9.0±0.0                                                         | 12.0±0.0     | AB                                     |
| 3                   | (3-Methyl-2-oxiranyl)-methanol                   | 740                                   | -                                                               | 77.0±0.0     | AB                                     |
| 4                   | 2,3-Butanediol                                   | 816                                   | -                                                               | 2.0±0.0      | AB                                     |
| 5                   | 1-Hexanol                                        | 852                                   | 38.0±17.0                                                       | 95.0±120.2   | AB                                     |
| 6                   | 2-Heptanol                                       | 887                                   | 1.5±2.1                                                         | 2.0±0.0      | AB                                     |
| 7                   | 6-Methyl-3-heptanol                              | 949                                   | -                                                               | 1.0±0.0      | AB                                     |
| 8                   | 1-Octen-3-ol                                     | 968                                   | 0.5±0.7                                                         | -            | AB                                     |
| 9                   | 2-Ethyl-1-hexanol                                | 1017                                  | 0.5±0.0                                                         | 2.0±2.8      | AB                                     |
| 10                  | 2-Methyl-6-methylene-7-octen-2-ol                | 1058                                  | -                                                               | 18.0±12.7    | AB                                     |
| 11                  | 1-Octanol                                        | 1077                                  | -                                                               | 0.5±0.7      | AB                                     |
| 12                  | 4-Nonanol                                        | 1080                                  | -                                                               | 19.5±6.4     | AB                                     |
| 13                  | 3,7-Dimethyl-1,5,7-octatrien-3-ol                | 1092                                  | -                                                               | 8.0±11.3     | AB                                     |
| 14                  | Phenylethyl alcohol                              | 1101                                  | 35.0±4.2                                                        | 42.0±4.2     | AB                                     |
| 15                  | 1-Nonanol                                        | 1160                                  | 0.4±0.0                                                         | 0.5±0.7      | AB                                     |
| 16                  | 2,7-Dimethyl-2,7-octanediol                      | 1165                                  | -                                                               | 0.5±0.7      | AB                                     |
| 17                  | 2,6,6-Trimethyl-bicyclo[3.1.1]heptan-3-ol,       | 1208                                  | -                                                               | 0.5±0.7      | AB                                     |
| 18                  | (R)-3,7-Dimethyl-6-octen-1-ol                    | 1213                                  | -                                                               | 1.5±2.1      | AB                                     |
| 19                  | $\beta$ ,4-Dimethyl-3-cyclohexene-1-ethanol      | 1285                                  | 1.0±0.0                                                         | 1.0±1.4      | AB                                     |
| 20                  | 2-Butyl-1-octanol                                | 1457                                  | -                                                               | 0.5±0.7      | AB                                     |
| 21                  | 9-Dodecyn-1-ol                                   | 1489                                  | 1.0±1.4                                                         | 0.1±0.2      | AB                                     |
| 22                  | (E)-3,7,11-Trimethyl-1,6,10-dodecatrien-3-ol     | 1540                                  | -                                                               | 0.5±0.7      | AB                                     |
| 23                  | 6,11-Dimethyl-2,6,10-dodecatrien-1-ol            | 1551                                  | 0.5±0.7                                                         | -            | AB                                     |
| <b>Total</b>        |                                                  |                                       | <b>135.4</b>                                                    | <b>307.7</b> |                                        |
| <i>Esters</i>       |                                                  |                                       |                                                                 |              |                                        |
| 24                  | Propanoic acid, 2-hydroxy-, methyl ester         | 789                                   | -                                                               | 3.0±4.2      | AB                                     |
| 25                  | Butyrolactone                                    | 908                                   | -                                                               | 0.2±0.2      | AB                                     |
| 26                  | Hexanoic acid, 5-methyl-, methyl ester           | 924                                   | -                                                               | 1.0±1.4      | AB                                     |
| 27                  | Pentanoic acid, 4-methyl-, ethyl ester           | 951                                   | -                                                               | 0.2±0.3      | AB                                     |
| 28                  | Hexanoic acid, ethyl ester                       | 986                                   | -                                                               | 13.0±4.2     | AB                                     |
| 29                  | Hex-4-enoic acid, ethyl ester                    | 987                                   | 19.5±4.9                                                        | -            | AB                                     |
| 30                  | Acetic acid, hexyl ester                         | 1000                                  | 5.5±0.7                                                         | 4.0±1.4      | AB                                     |
| 31                  | Propyl 2,4-hexadienecarboxylate                  | 1085                                  | 6.0±0.0                                                         | -            | AB                                     |
| 32                  | 11-(2-Cyclopentenyl)undecanoic acid, ethyl ester | 1096                                  | -                                                               | 0.1±0.1      | AB                                     |
| 33                  | Octanoic acid, methyl ester                      | 1122                                  | -                                                               | 0.1±0.2      | AB                                     |
| 34                  | Butanoic acid, 2-methyl-, pentyl ester           | 1124                                  | -                                                               | 0.1±0.1      | AB                                     |
| 35                  | Benzoic acid, ethyl ester                        | 1156                                  | -                                                               | 0.5±0.7      | AB                                     |
| 36                  | Methyl salicylate                                | 1177                                  | 1.0±0.000                                                       | 8.0±0.099    | AB                                     |

|              |                                                                     |      |             |             |    |
|--------------|---------------------------------------------------------------------|------|-------------|-------------|----|
| 37           | Butanoic acid, 2-methyl-, hexyl ester                               | 1185 | -           | 8.0±11.3    | AB |
| 38           | Butanoic acid, 3-methyl-, hexyl ester                               | 1191 | -           | 7.0±0.0     | AB |
| 39           | 2-Propenoic acid, 6-methylheptyl ester                              | 1225 | -           | 0.1±0.2     | AB |
| 40           | 2-Ethylhexyl acrylate                                               | 1225 | -           | 0.1±0.0     | AB |
| 41           | Benzeneacetic acid, ethyl ester                                     | 1226 | -           | 1.2±1.1     | AB |
| 42           | Acetic acid, 2-phenylethyl ester                                    | 1238 | 4.0±0.000   | 0.5±0.7     | AB |
| 43           | Octanoic acid, ethyl ester                                          | 1245 | -           | 1.7±1.8     | AB |
| 44           | Propanoic acid, 2,2-dimethyl-, heptyl ester                         | 1290 | -           | 0.2±0.3     | AB |
| 45           | Hexanoic acid, hexyl ester                                          | 1300 | -           | 3.5±3.5     | AB |
| 46           | 3,7-Dimethyl-oct-6-enoic acid, ethyl ester                          | 1323 | 3.0±1.4     | 0.2±0.3     | AB |
| 47           | Ethyl 9-decenoate                                                   | 1323 | -           | 5.0±7.1     | AB |
| 48           | Pentanoic acid, 2,2,4-trimethyl-3-hydroxy-, isobutyl ester          | 1340 | -           | 0.5±0.7     | AB |
| 49           | Propanoic acid, 2-methyl-, 2-ethyl-3-hydroxyhexyl ester             | 1353 | 0.2±0.2     | 0.5±0.7     | AB |
| 50           | Decanoic acid, ethyl ester                                          | 1377 | -           | 0.6±0.6     | AB |
| 51           | Dodecanoic acid, methyl ester                                       | 1520 | -           | 1.0±1.4     | AB |
| 52           | 2,2,4-Trimethyl-1,3-pentanediol diisobutyrate                       | 1564 | 1.0±0.0     | 0.7±0.4     | AB |
| 53           | Isopentyl 8-methylnon-6-enoate                                      | 1565 | -           | 0.5±0.7     | AB |
| 54           | Pentanoic acid, 2,2,4-trimethyl-3-carboxy isopropyl, isobutyl ester | 1565 | -           | 0.5±0.7     | AB |
| 55           | Dodecanoic acid, ethyl ester                                        | 1569 | 2.0±0.0     | 1.5±0.7     | AB |
| 56           | Pentadecanoic acid, 3-methylbutyl ester                             | 1581 | -           | 0.1±0.1     | AB |
| 57           | Methyl tetradecanoate                                               | 1719 | -           | 0.5±0.7     | AB |
| 58           | Tetradecanoic acid, ethyl ester                                     | 1762 | 5.5±0.7     | 1.7±1.8     | AB |
| 59           | Pentadecanoic acid, ethyl ester                                     | 1824 | 1.0±0.0     | 0.5±0.7     | AB |
| 60           | 1-Pentadecanol acetate                                              | 1838 | 0.5±0.7     | 0.1±0.1     | AB |
| 61           | 1,2-Benzenedicarboxylic acid, bis(2-methylpropyl) ester             | 1919 | 2.0±0.0     | 0.1±0.1     | AB |
| 62           | Hexadecanoic acid, 15-methyl-, methyl ester                         | 1920 | -           | 0.5±0.7     | AB |
| 63           | Ethyl 9-hexadecenoate                                               | 1934 | 1.0±0.0     | 0.4±0.2     | AB |
| 64           | Hexadecanoic acid, ethyl ester                                      | 1955 | 8.5±2.1     | 3.5±0.7     | AB |
| 65           | 9,12-Octadecadienoic acid, methyl ester                             | 2086 | -           | 0.2±0.3     | AB |
| <b>Total</b> |                                                                     |      | <b>60.7</b> | <b>67.6</b> |    |
|              | <b>Acids</b>                                                        |      |             |             |    |
| 66           | Acetic acid                                                         | <700 | 54.5±13.4   | 45.5±27.6   | AB |
| 67           | Butanoic acid                                                       | 790  | -           | 0.5±0.7     | AB |
| 68           | L-Lactic acid                                                       | 813  | -           | 0.5±0.7     | AB |
| 69           | 3-Methylbutanoic acid                                               | 870  | -           | 0.5±0.7     | AB |
| 70           | 2-Methylbutanoic acid                                               | 878  | -           | 1.5±2.1     | AB |
| 71           | Hexanoic acid                                                       | 1021 | 7.5±4.9     | 8.0±4.2     | AB |
| 72           | (E)-3-Hexenoic acid                                                 | 1026 | 5.5±7.7     | -           | AB |
| 73           | Heptanoic acid                                                      | 1086 | -           | 0.5±0.7     | AB |
| 74           | Sorbic acid                                                         | 1124 | 7.0±2.8     | -           | AB |

|              |                                                            |      |             |              |    |
|--------------|------------------------------------------------------------|------|-------------|--------------|----|
| 75           | Nonanoic acid                                              | 1264 | -           | 0.1±0.2      | AB |
| 76           | 9-Decenoic acid                                            | 1323 | 0.5±0.7     | 0.3±0.3      | AB |
| 77           | n-Hexadecanoic acid                                        | 1954 | -           | 3.0±4.2      | AB |
| <b>Total</b> |                                                            |      | <b>75.0</b> | <b>102.0</b> |    |
|              | <i>Aldehydes</i>                                           |      |             |              |    |
| 78           | Hexanal                                                    | 801  | -           | 1.5±2.1      | AB |
| 79           | (Z)-2-Heptenal                                             | 956  | -           | 0.1±0.2      | AB |
| 80           | Benzaldehyde                                               | 960  | -           | 2.0±2.8      | AB |
| 81           | Octanal                                                    | 1004 | -           | 2.0±2.8      | AB |
| 82           | (E)-2-Octenal                                              | 1057 | -           | 0.5±0.7      | AB |
| 83           | phenylacetaldehyde                                         | 1071 | -           | 1.5±2.1      | AB |
| 84           | Nonanal                                                    | 1091 | 25.5±34.6   | 5.0±7.1      | AB |
| 85           | (E)-2-Nonenal                                              | 1146 | 0.7±0.5     | 1.0±0.0      | AB |
| 86           | α,4-Dimethyl-3-cyclohexene-1-acetaldehyde                  | 1163 | 2.0±0.0     | 1.0±0.0      | AB |
| 87           | (Z)-(3,3-dimethylcyclohexylidene)-acetaldehyde,            | 1172 | 0.4±0.1     | 0.5±0.7      | AB |
| 88           | Decanal                                                    | 1191 | 0.5±0.7     | 0.5±0.7      | AB |
| 89           | 3-(2,6,6-Trimethyl-1-cyclohexen-1-yl)-2-propenal           | 1392 | -           | 0.5±0.7      | AB |
| 90           | 4-(2,2-Dimethyl-6-methylenecyclohexyl)butanal              | 1479 | -           | 4.5±0.7      | AB |
| 91           | Tetradecanal                                               | 1650 | -           | 0.5±0.7      | AB |
| <b>Total</b> |                                                            |      | <b>29.1</b> | <b>21.1</b>  |    |
|              | <i>Phenols</i>                                             |      |             |              |    |
| 92           | 3,4-Dimethylphenol                                         | 1164 | -           | 4.0±5.7      | AB |
| 93           | 4-ethylguaiaicol                                           | 1259 | -           | 4.5±3.5      | AB |
| 94           | 4-vinylguaiaicol                                           | 1295 | 1.0±0.0     | 2.0±2.8      | AB |
| <b>Total</b> |                                                            |      | <b>0.5</b>  | <b>10.5</b>  |    |
|              | <i>Ketones</i>                                             |      |             |              |    |
| 95           | 5-Hepten-2-one                                             | 876  | 2.5±0.7     | -            | AB |
| 96           | 3-Octanone                                                 | 970  | 0.3±0.0     | -            | AB |
| 97           | 4-Cyclopentylidene-2-butanone                              | 1117 | 3.0±0.0     | 0.5±0.7      | AB |
| 98           | 5-Hydroxy-2,7-dimethyl-4-Octanone                          | 1169 |             | 1.0±1.4      | AB |
| 99           | 1-(3-Methylphenyl)-ethanone                                | 1170 | 0.1±0.1     | -            | AB |
| 100          | 1-(4-Methylphenyl)-ethanone                                | 1170 | 0.1±0.0     | -            | AB |
| 101          | 1-(2,6,6-Trimethyl-1,3-cyclohexadien-1-yl)-2-buten-1-one   | 1360 | 1.5±0.7     | 3.5±2.1      | AB |
| 102          | (Z)-1-(3,5,5-Trimethyl-2-cyclohexen-1-ylidene)-2-propanone | 1379 | 1.0±0.1     | -            | AB |
| 103          | (Z)-6,10-Dimethyl-5,9-undecadien-2-one                     | 1407 | -           | 1.0±0.1      | AB |
| 104          | 2-Tridecanone                                              | 1493 | -           | 1.5±2.1      | AB |
| 105          | 2-Pentadecanone                                            | 1693 | -           | 1.0±0.1      | AB |
| 106          | 2-Hexadecanone                                             | 1694 | -           | 1.0±0.1      | AB |
| <b>Total</b> |                                                            |      | <b>8.3</b>  | <b>8.7</b>   |    |
|              | <i>Furan(ones)</i>                                         |      |             |              |    |
| 107          | Dihydro-4-methyl-2(3H)-furanone                            | 916  | -           | 0.5±0.7      | AB |

|              |                                                                       |      |             |              |    |
|--------------|-----------------------------------------------------------------------|------|-------------|--------------|----|
| 108          | Tetrahydro-2,2-dimethyl-5-(1-methyl-1-propenyl)-furan                 | 1032 | 1.5±2.1     | -            | AB |
| 109          | cis-5-Ethenyltetrahydro- $\alpha,\alpha,5$ -trimethyl-2-furanmethanol | 1074 | -           | 5.5±7.8      | AB |
| 110          | 3,6-Dimethyl-2,3,3a,4,5,7a-hexahydrobenzofuran                        | 1173 | 0.2±0.3     |              | AB |
| <b>Total</b> |                                                                       |      | <b>1.7</b>  | <b>6.0</b>   |    |
|              | <i>pyran(ones)</i>                                                    |      |             |              |    |
| 111          | 2-Ethenyltetrahydro-2,6,6-trimethyl-2H-pyran                          | 955  | 7.0±0.4     | 3.5±0.7      | AB |
| 112          | 3,6-Dihydro-4-methyl-2-(2-methyl-1-propenyl)-2H-pyran                 | 1138 | 14.0±0.0    | 3.5±0.7      | AB |
| 113          | 2-Hydroxy-3-acetyl-6-methyl-4-pyrone                                  | 1342 | 24.0±7.1    | -            | AB |
| <b>Total</b> |                                                                       |      | <b>38.7</b> | <b>7.00</b>  |    |
|              | <i>Terpenes</i>                                                       |      |             |              |    |
| 114          | D-Limonene                                                            | 1016 | -           | 35.0±0.0     | AB |
| 115          | $\alpha$ -Pinene                                                      | 1023 | -           | 0.5±0.0      | AB |
| 116          | trans- $\beta$ -Ocimene                                               | 1023 | -           | 0.5±0.0      | AB |
| 117          | (Z)-3,7-Dimethyl-1,3,6-octatriene,                                    | 1034 | -           | 2.0±1.4      | AB |
| 118          | trans-Linalool oxide (furanoid)                                       | 1059 | 19.0±2.8    |              | AB |
| 119          | Linalool                                                              | 1088 | 2.0±0.0     | 89.5±112.4   | AB |
| 120          | 2,6-Dimethyl-5,7-octadien-2-ol                                        | 1152 | -           | =1.0±1.4     | AB |
| 121          | $\alpha$ -Terpineol                                                   | 1182 | 13.0±17.0   | 34.5±21.9    | AB |
| 122          | $\beta$ -copaene                                                      | 1204 | -           | 1.0±1.4      | AB |
| 123          | 2,7-Dimethyl-2,6-octadien-1-ol                                        | 1211 | -           | 0.5±0.7      | AB |
| 124          | Citronellol                                                           | 1213 | -           | 2.0±2.8      | AB |
| 125          | Geraniol                                                              | 1248 | -           | 0.5±0.7      | AB |
| 126          | Nerol                                                                 | 1249 | -           | 0.5±0.7      | AB |
| 127          | cis-Thujopsene                                                        | 1432 | -           | 0.2±0.3      | AB |
| 128          | $\alpha$ -Santalol                                                    | 1446 | 0.6±0.5     | 0.5±0.7      | AB |
| 129          | $\alpha$ -Guaiene                                                     | 1466 | 3.0±1.4     |              | AB |
| 130          | $\beta$ -Vatirenene                                                   | 1470 | -           | 7.0±9.9      | AB |
| 131          | Nerolidol                                                             | 1557 | -           | 0.5±0.7      | AB |
| <b>Total</b> |                                                                       |      | <b>37.6</b> | <b>136.7</b> |    |
|              | <i>Carbohydrates</i>                                                  |      |             |              |    |
| 132          | 1,3,5,7-Cyclooctatetraene                                             | 889  | -           | 2.5±3.5      | AB |
| 133          | 2,6-Dimethyl-1,6-octadiene                                            | 976  | 2.5±3.5     | 1.5±2.1      | AB |
| 134          | Hexylidene-cyclopropane                                               | 976  | -           | 4.0±5.7      | AB |
| 135          | 4,6-Decadiene                                                         | 991  | 1.5±2.1     | -            | AB |
| 136          | 1-Methyl-4-(1-methylethenyl)-cyclohexene                              | 1016 | 2.0±1.4     | -            | AB |
| 137          | 1-Decen-3-yne                                                         | 1036 | -           | 0.5±0.7      | AB |
| 138          | 1-Methyl-4-(1-methylethylidene)-cyclohexene                           | 1071 | 0.5±0.7     | -            | AB |
| 139          | 3-Methyl-6-(1-methylethylidene)-cyclohexene                           | 1072 | -           | 2.5±3.5      | AB |
| 140          | 7-Ethenyl-5-undecene                                                  | 1084 | -           | 0.5±0.7      | AB |
| 141          | 1-Pentyl-cyclopentene                                                 | 1084 | -           | 0.3±0.4      | AB |

|              |                                                                              |      |             |             |    |
|--------------|------------------------------------------------------------------------------|------|-------------|-------------|----|
| 142          | Naphthalene                                                                  | 1183 | -           | 0.2±0.3     | AB |
| 143          | 2,7,7-Trimethyl-bicyclo[2.2.1]hept-2-ene                                     | 1229 | -           | 0.1±1.4     | AB |
| 144          | 1,2,3,4-Tetrahydro-1,1,6-trimethyl-naphthalene                               | 1292 | -           | 0.1±0.2     | AB |
| 145          | 1-Methylnaphthalene,                                                         | 1294 | -           | 0.1±0.1     | AB |
| 146          | Benzocycloheptatriene                                                        | 1294 | -           | 0.1±0.1     | AB |
| 147          | Tridecane                                                                    | 1299 | -           | 0.1±0.1     | AB |
| 148          | Megastigma-4,6(Z),8(E)-triene                                                | 1320 | -           | 5.5±7.8     | AB |
| 149          | (1R,2S,7R,8R)-2,6,6,9-Tetramethyl-tricyclo[5.4.0.0(2,8)]undec-9-ene          | 1332 | 1.5±0.7     | 0.5±0.7     | AB |
| 150          | 2-Methyl-tridecane                                                           | 1346 | 4.0±1.4     | 5.5±6.4     | AB |
| 151          | Isosativene                                                                  | 1356 | 1.0±0.0     | -           | AB |
| 152          | Tetradecane                                                                  | 1385 | 1.0±0.0     | 5.5±6.4     | AB |
| 153          | 1,1-Dimethyl-2-nonyl-cyclopropane,                                           | 1435 | 1.0±1.4     | -           | AB |
| 154          | 2-Methyl-1-tetradecene                                                       | 1436 |             | 3.0±4.2     | AB |
| 155          | 2,4a,5,6,7,8,9,9a-Octahydro-3,5,5-trimethyl-9-methylene-1H-benzocycloheptene | 1439 | 2.0±0.0     | 2.5±3.5     | AB |
| 156          | 2-Methyl-tetradecane                                                         | 1452 | 1.0±1.4     | 3.5±5.0     | AB |
| 157          | 4,5-Di-epi-aristolochene                                                     | 1469 | 1.0±1.4     | 24.0±33.9   | AB |
| 158          | 3-Tetradecyne                                                                | 1479 | 2.0±0.0     | 2.0±2.8     | AB |
| 159          | 7-Tetradecyne                                                                | 1489 | 1.0±1.4     | -           | AB |
| 160          | Guaia-1(10),11-diene                                                         | 1492 | -           | 19.0±26.9   | AB |
| 161          | 2-Methyl-3-undecene                                                          | 1617 | -           | 0.2±0.2     | AB |
| <b>Total</b> |                                                                              |      | <b>22.0</b> | <b>84.5</b> |    |
|              | <b><i>Sulfur-containing compounds</i></b>                                    |      |             |             |    |
| 162          | Methional                                                                    | 905  | -           | 0.5±0.7     | AB |
| 163          | [2-(ethylthio)ethyl]-Benzene                                                 | 1317 | -           | 0.5±0.7     | AB |
| <b>Total</b> |                                                                              |      | <b>0.0</b>  | <b>1.0</b>  |    |
|              | <b><i>Nitrogen-containing compounds</i></b>                                  |      |             |             |    |
| 164          | 2-Hydroxy-3-cyanopyridine                                                    | 1190 | -           | 0.5±0.7     | AB |
| 165          | 1-Methyl-2-nitro-benzene                                                     | 1216 | -           | 0.5±0.7     | AB |
| 166          | N-[4-Bromo-n-butyl]-2-piperidinone                                           | 1660 | -           | 0.1±0.2     | AB |
| 167          | 3-Amino-5-(4-morpholinylmethyl)-2-oxazolidinone                              | 1855 | -           | 0.1±0.2     | AB |
| <b>Total</b> |                                                                              |      | <b>0.0</b>  | <b>1.2</b>  |    |
|              | <b><i>Others</i></b>                                                         |      |             |             |    |
| 168          | Ethyl maltol                                                                 | 1184 | 7.0±0.0     | -           | AB |
| 169          | 5-Methoxyindane                                                              | 1272 | 1.5±1.4     | 0.2±0.3     | AB |
| 170          | 3-Ethenyl-2,3-dihydro-1,1-dimethyl-1H-indene                                 | 1347 | -           | 0.2±0.2     | AB |
| 171          | 1-Ethenyl-1-methyl-2,4-bis(1-methylethenyl)-cyclohexane                      | 1386 |             | 0.5±0.7     | AB |
| 172          | Decahydro-1,1,7-trimethyl-4-methylene-1H-cycloprop[e] azulene                | 1424 | -           | 0.5±0.7     | AB |
| 173          | 1,2,3,3a,4,5,6,7-Octahydro-1,4-dimethyl-7-(1-methylethenyl)-azulene          | 1453 |             | 0.5±0.7     | AB |

**Total****22.0****2.3**

---

2 <sup>1</sup> Retention indices calculated on SH-Rxi-5Sil MS capillary column.

3 <sup>2</sup> Relative percentage to that of internal standard (0.05 mg/mL, 20  $\mu$ L heptanoic acid methyl ester in methanol) using SH-Rxi-  
4 5Sil MS capillary column. Values expressed as average (n=6)  $\pm$ standard deviation, - represents not detected.

5 <sup>3</sup> <sup>d</sup> Method of identification: by comparison of the mass spectrum (A) and RI (B) with the standard database (NIST 14,  
6 Gaithersburg, MD, USA).
